# Supplementary material for: KIF23 activated Wnt/β-catenin signaling pathway through direct interaction with Amer1 in gastric cancer
Source: publisher site journal article supplement (doi:10.18632/aging.103146), 2020-05-04
Supplement: Supplementary file [file aging-v12i9-103146-supplementary-material-SD2.pdf]

## SUPPLEMENTARY TABLES

**Supplementary Table 1. Primers used in study.**

| Name             | Forward sequence (5'-3') | Reverse sequence (5'-3') |
|------------------|--------------------------|--------------------------|
| ACTIN            | TGAAGTACCCCATCGAGCACGGCA | GATAGCACAGCCTGGATAGCAACG |
| SURVIVIN         | CTTGGCCCAGTGTTTCTTCT     | TCTCCGCAGTTTCTCAAAT      |
| PRC1             | GAGAGCTCTGGGACAGGTTG     | TCTTCCAACCGATCCACTTC     |
| C-MYC            | CACATCAGCACAACACTACG     | TTCGCCTCTTGACATTCT       |
| cyclinD1         | CTCGGTGTCTACTTCA         | TCCTCGCACTTCTGTTC        |
| $\beta$ -catenin | GTGTGGCGACATATGCAGCT     | CAAGATCAGCAGTCTCATTC     |
| DUT              | TTGATGTAGGAGCTGGTGTCA    | GCAAATGAGCTGTGCAATTC     |
| MMP7             | GTCTCGGAGGAGATGCTCAC     | GGAATGTCCCATAACCCAAAG    |
| LGR5             | TGTGCATTTGGAGTGTGTGA     | CACGTTTTCATCTTGAGCCTGA   |
| TCF1             | CCCACAGGTGATGAGCTACC     | GCTCCTCCTTGCTAGGGTTC     |
| LEF1             | ATATGATTCCTGGTCTCTCT     | TGAGGCTTCACGTGCATTAG     |
| DKK1             | CATCAGACTGTGCCTCAGGA     | GTCCATGAGAGCCTTTTCTCC    |
| POLD3            | CTTGGTGTCTGGCAGTCTCA     | TACACATGGATGCTGGCAGT     |
| AXIN2            | AGTCAGCAGAGGGACAGGAA     | GTGGACACCTGCCAGTTTCT     |
| KIF23            | TCCCTGTTGACTTTGGGAAG     | TGTACGCCCTCCAAGAGAAT     |

**Supplementary Table 2. Antibodies used in study.**

| Antibody         | Source                    | Country |
|------------------|---------------------------|---------|
| ABC              | Cell Signaling Technology | USA     |
| $\beta$ -catenin | Cell Signaling Technology | USA     |
| p-GSK3 $\beta$   | Cell Signaling Technology | USA     |
| GSK3 $\beta$     | Cell Signaling Technology | USA     |
| C-myc            | Cell Signaling Technology | USA     |
| CyclinD1         | Cell Signaling Technology | USA     |
| IRDye 800CW      | LI-COR Biosciences        | USA     |
| IRDye 680CW      | LI-COR Biosciences        | USA     |
| KIF23            | Santa Cruz Biotechnology  | USA     |
| FLAG             | Cell Signaling Technology | USA     |
| Amer1            | Abcam                     | USA     |
| APC              | Abcam                     | USA     |
| PRC1             | Abcam                     | USA     |
| Histon H3        | Beyotime                  | China   |
| Pan-cadherin     | Abcam                     | USA     |
| Actin            | Cell Signaling Technology | USA     |

**Supplementary Table 3. Summary of patient characteristics.**

| <b>Clinicopathological feature</b> | <b>Number of cases</b> | <b>Expression of KIF23 (mean±SEM)</b> | <b>P value</b>          |
|------------------------------------|------------------------|---------------------------------------|-------------------------|
| Gender                             |                        |                                       |                         |
| Male                               | 79                     | 1.0792±0.464                          | 0.177                   |
| Female                             | 39                     | 0.9432±0.468                          |                         |
| Age(years)                         |                        |                                       |                         |
| ≥60                                | 75                     | 0.8727±0.454                          | 0.274                   |
| <60                                | 43                     | 1.0467±0.485                          |                         |
| Tumor size(cm)                     |                        |                                       |                         |
| ≥5                                 | 69                     | 1.8322±0.546                          | 0.0412*                 |
| <5                                 | 49                     | 0.5667±0.213                          |                         |
| Tumor venous infiltration          |                        |                                       |                         |
| Yes                                | 43                     | 1.5612±0.512                          | 0.0481*                 |
| No                                 | 0                      |                                       |                         |
| Not available                      | 75                     | 0.6182±0.232                          |                         |
| TNM stage                          |                        |                                       |                         |
| I                                  | 4                      | 0.9723±0.572                          | 0.00792*** <sup>a</sup> |
| II                                 | 47                     | 2.2123±0.612                          |                         |
| III                                | 67                     | 3.3465±0.523                          |                         |

\*P<0.05, \*\*P<0.01 versus the control.a,b, versus the stage I.
